# Supplementary material for: Ceramide stearic to palmitic acid ratio predicts incident diabetes
Source: Springer Nature journal article supplement (doi:10.1007/s00125-018-4590-6), 2018-03-15
Supplement: MOESM1 [file 15537610]

## ESM: Ceramide stearic to palmitic acid ratio predicts incident diabetes

### ESM Tables

**ESM Table 1.** Baseline characteristics of the FINRISK 2002 study population.

| Characteristic                  | No diabetes         | Incident diabetes   | Prevalent diabetes  |
|---------------------------------|---------------------|---------------------|---------------------|
| N                               | 7007                | 593                 | 445                 |
| Sex (male)                      | 46 %                | 58 %                | 48 %                |
| Current smoker                  | 26 %                | 27 %                | 20 %                |
| Lipid treatment                 | 6 %                 | 14 %                | 28 %                |
| Eastern Finland                 | 68 %                | 66 %                | 73 %                |
| Age (years)                     | 47 (36-57)          | 55 (47-61)          | 58 (50-64)          |
| BMI                             | 25.9 (23.4-28.7)    | 30.4 (27.7-33.7)    | 29.8 (26.5-33.5)    |
| Waist (cm)                      | 87 (78-96)          | 102 (94-110)        | 100 (90-109)        |
| Systolic blood pressure (mmHg)  | 131 (120-145)       | 143 (130-158)       | 140 (126-155)       |
| TC (mmol/l)                     | 5.5 (4.8-6.2)       | 5.8 (5.1-6.6)       | 5.4 (4.8-6.1)       |
| LDL-C (mmol/l)                  | 3.3 (2.7-3.9)       | 3.6 (3.0-4.2)       | 3.2 (2.7-3.7)       |
| HDL-C (mmol/l)                  | 1.5 (1.2-1.8)       | 1.2 (1.1-1.5)       | 1.3 (1.1-1.6)       |
| TG (mmol/l)                     | 1.1 (0.8-1.6)       | 1.7 (1.2-2.4)       | 1.6 (1.1-2.4)       |
| CRP (mg/l)                      | 1.0 (0.5-2.3)       | 2.0 (1.0-4.3)       | 1.8 (0.9-3.7)       |
| Cer(d18:1/18:0)/Cer(d18:1/16:0) | 0.398 (0.337-0.470) | 0.490 (0.420-0.558) | 0.459 (0.389-0.554) |
| Cer(d18:1/16:0)/Cer(d18:1/24:0) | 0.126 (0.111-0.144) | 0.119 (0.104-0.136) | 0.122 (0.109-0.143) |
| Cer(d18:1/18:0)/Cer(d18:1/24:0) | 0.050 (0.041-0.062) | 0.059 (0.049-0.070) | 0.057 (0.047-0.069) |
| Cer(d18:1/24:1)/Cer(d18:1/24:0) | 0.674 (0.593-0.762) | 0.688 (0.613-0.779) | 0.688 (0.607-0.787) |
| Cer(d18:1/16:0) (μmol/l)        | 0.283 (0.241-0.334) | 0.297 (0.257-0.351) | 0.296 (0.250-0.351) |
| Cer(d18:1/18:0) (μmol/l)        | 0.112 (0.087-0.146) | 0.145 (0.115-0.184) | 0.136 (0.104-0.177) |
| Cer(d18:1/24:0) (μmol/l)        | 2.251 (1.838-2.738) | 2.486 (2.043-3.036) | 2.420 (1.951-2.948) |
| Cer(d18:1/24:1) (μmol/l)        | 1.504 (1.235-1.831) | 1.683 (1.418-2.067) | 1.651 (1.350-2.019) |

*Data are median (interquartile range) or % from total. The data of all variables were available for all individuals. LDL-C, LDL cholesterol; TC, total cholesterol.*

**ESM Table 2.** Hazard ratios of cardiovascular risk associated ceramides and ceramide ratios for incident diabetes in FINRISK 2002.

| FINRISK 2002                    | HR (95% CI) <sup>a</sup> | <i>p</i> value <sup>a</sup> | HR (95% CI) <sup>b</sup> | <i>p</i> value <sup>b</sup> |
|---------------------------------|--------------------------|-----------------------------|--------------------------|-----------------------------|
| Cer(d18:1/16:0)/Cer(d18:1/24:0) | 0.83 (0.77, 0.90)        | 1.2×10 <sup>-5</sup>        | 0.85 (0.78, 0.93)        | 2.4×10 <sup>-4</sup>        |
| Cer(d18:1/18:0)/Cer(d18:1/24:0) | 1.72 (1.59, 1.87)        | <2.2×10 <sup>-16</sup>      | 1.19 (1.09, 1.31)        | 2.4×10 <sup>-4</sup>        |
| Cer(d18:1/24:1)/Cer(d18:1/24:0) | 1.19 (1.09, 1.29)        | 5.6×10 <sup>-5</sup>        | 1.02 (0.94, 1.11)        | 0.629                       |
| Cer(d18:1/16:0)                 | 1.25 (1.15, 1.35)        | 6.8×10 <sup>-8</sup>        | 1.04 (0.95, 1.13)        | 0.425                       |
| Cer(d18:1/18:0)                 | 1.95 (1.80, 2.12)        | <2.2×10 <sup>-16</sup>      | 1.32 (1.20, 1.45)        | 1.7×10 <sup>-8</sup>        |
| Cer(d18:1/24:0)                 | 1.37 (1.26, 1.49)        | 1.2×10 <sup>-13</sup>       | 1.16 (1.06, 1.26)        | 0.002                       |
| Cer(d18:1/24:1)                 | 1.53 (1.41, 1.66)        | <2.2×10 <sup>-16</sup>      | 1.17 (1.07, 1.28)        | 3.8×10 <sup>-4</sup>        |
| FINRISK 2002 substudy           |                          |                             |                          |                             |
| Cer(d18:1/16:0)/Cer(d18:1/24:0) | 0.90 (0.79, 1.04)        | 0.147                       | 1.02 (0.88, 1.18)        | 0.794                       |
| Cer(d18:1/18:0)/Cer(d18:1/24:0) | 1.64 (1.43, 1.87)        | 3.6×10 <sup>-13</sup>       | 1.25 (1.08, 1.46)        | 0.004                       |
| Cer(d18:1/24:1)/Cer(d18:1/24:0) | 1.14 (1.00, 1.31)        | 0.056                       | 1.15 (1.00, 1.32)        | 0.052                       |
| Cer(d18:1/16:0)                 | 1.06 (0.93, 1.21)        | 0.395                       | 1.07 (0.93, 1.24)        | 0.320                       |
| Cer(d18:1/18:0)                 | 1.66 (1.45, 1.90)        | 1.7×10 <sup>-13</sup>       | 1.27 (1.09, 1.48)        | 0.002                       |
| Cer(d18:1/24:0)                 | 1.13 (0.98, 1.29)        | 0.086                       | 1.05 (0.91, 1.22)        | 0.506                       |
| Cer(d18:1/24:1)                 | 1.24 (1.09, 1.42)        | 0.002                       | 1.17 (1.01, 1.34)        | 0.032                       |

HRs are expressed per 1 SD.

<sup>a</sup>Unadjusted models, stratified by sex.

<sup>b</sup>The models were stratified by sex and adjusted for age at baseline, BMI, waist circumference, eastern location in Finland, HDL-C, CRP, systolic blood pressure (15 mmHg added for those on antihypertensive medication), lipid lowering treatment, current smoking, family history of diabetes, physical activity and educational level, and in the substudy additionally for fasting glucose and HbA<sub>1c</sub>.

**ESM Table 3.** Baseline characteristics of the FINRISK 2002 substudy with fasting glucose and HbA<sub>1c</sub> data available.

| Characteristic                  | No diabetes         | Incident diabetes   | Prevalent diabetes  |
|---------------------------------|---------------------|---------------------|---------------------|
| N                               | 1752                | 217                 | 150                 |
| Sex (male)                      | 48 %                | 54 %                | 49 %                |
| Current smoker                  | 19 %                | 14 %                | 14 %                |
| Lipid treatment                 | 12 %                | 19 %                | 33 %                |
| Eastern Finland                 | 70 %                | 70 %                | 71 %                |
| Age (years)                     | 59 (53-67)          | 60 (54-67)          | 62 (54-67)          |
| BMI                             | 26.7 (24.3-29.5)    | 30.1 (27.9-33.3)    | 30.2 (27.6-33.1)    |
| Waist (cm)                      | 90 (82-98)          | 100 (91-110)        | 100 (92-108)        |
| Glucose (mmol/l)                | 5.6 (5.3-6.0)       | 6.4 (5.9-6.9)       | 7.0 (6.1-8.5)       |
| HbA <sub>1c</sub> (mmol/mol)    | 37 (34-39)          | 40 (38-43)          | 44 (40-56)          |
| HbA <sub>1c</sub> (%)           | 5.5 (5.3-5.7)       | 5.8 (5.6-6.1)       | 6.2 (5.8-7.3)       |
| Systolic blood pressure (mmHg)  | 140 (127-155)       | 148 (135-163)       | 142 (130-158)       |
| TC (mmol/l)                     | 5.7 (5.1-6.4)       | 5.8 (5.1-6.7)       | 5.6 (4.9-6.3)       |
| LDL-C (mmol/l)                  | 3.5 (2.9-4.0)       | 3.6 (3.0-4.1)       | 3.3 (2.8-3.8)       |
| HDL-C (mmol/l)                  | 1.5 (1.2-1.8)       | 1.3 (1.1-1.5)       | 1.3 (1.1-1.5)       |
| TG (mmol/l)                     | 1.2 (0.9-1.7)       | 1.7 (1.2-2.2)       | 1.6 (1.1-2.4)       |
| CRP (mg/l)                      | 1.2 (0.6-2.5)       | 1.9 (1.0-3.8)       | 1.9 (0.9-3.8)       |
| Cer(d18:1/18:0)/Cer(d18:1/16:0) | 0.415 (0.351-0.482) | 0.498 (0.423-0.561) | 0.466 (0.397-0.563) |
| Cer(d18:1/16:0)/Cer(d18:1/24:0) | 0.127 (0.112-0.144) | 0.123 (0.108-0.142) | 0.119 (0.106-0.139) |
| Cer(d18:1/18:0)/Cer(d18:1/24:0) | 0.052 (0.043-0.064) | 0.060 (0.051-0.075) | 0.057 (0.047-0.072) |
| Cer(d18:1/24:1)/Cer(d18:1/24:0) | 0.688 (0.609-0.787) | 0.701 (0.632-0.795) | 0.681 (0.612-0.762) |
| Cer(d18:1/16:0) (μmol/l)        | 0.304 (0.260-0.350) | 0.298 (0.261-0.361) | 0.302 (0.249-0.366) |
| Cer(d18:1/18:0) (μmol/l)        | 0.123 (0.099-0.158) | 0.155 (0.115-0.188) | 0.138 (0.106-0.187) |
| Cer(d18:1/24:0) (μmol/l)        | 2.380 (1.980-2.867) | 2.437 (1.998-2.991) | 2.458 (2.086-3.085) |
| Cer(d18:1/24:1) (μmol/l)        | 1.645 (1.358-1.950) | 1.694 (1.425-2.102) | 1.678 (1.382-2.083) |

Data are median (interquartile range) or % from total. The data of all variables were available for all individuals. LDL-C, LDL cholesterol; TC, total cholesterol.

**ESM Table 4.** Hazard ratios of clinical laboratory measurements and systolic blood pressure for incident diabetes in the FINRISK 2002 substudy.

|                         | HR (95% CI) <sup>a</sup> | <i>p</i> value <sup>a</sup> | HR (95% CI) <sup>b</sup> | <i>p</i> value <sup>b</sup> |
|-------------------------|--------------------------|-----------------------------|--------------------------|-----------------------------|
| Glucose                 | 2.02 (1.89, 2.16)        | <2.2×10 <sup>-16</sup>      | 1.67 (1.49, 1.87)        | <2.2×10 <sup>-16</sup>      |
| HbA <sub>1c</sub>       | 2.44 (2.14, 2.78)        | <2.2×10 <sup>-16</sup>      | 1.59 (1.36, 1.87)        | 6.3×10 <sup>-9</sup>        |
| CRP                     | 1.51 (1.33, 1.71)        | 8.7×10 <sup>-11</sup>       | 1.10 (0.94, 1.29)        | 0.252                       |
| TC                      | 1.08 (0.95, 1.24)        | 0.234                       | 1.07 (0.93, 1.23)        | 0.355                       |
| LDL-C                   | 1.13 (0.98, 1.29)        | 0.087                       | 1.00 (0.86, 1.17)        | 0.963                       |
| HDL-C                   | 0.63 (0.55, 0.73)        | 3.3×10 <sup>-10</sup>       | 0.79 (0.67, 0.94)        | 0.006                       |
| TG                      | 1.66 (1.47, 1.86)        | 1.1×10 <sup>-16</sup>       | 1.26 (1.08, 1.47)        | 0.003                       |
| Systolic blood pressure | 1.58 (1.38, 1.81)        | 4.3×10 <sup>-11</sup>       | 1.28 (1.09, 1.49)        | 0.002                       |

HRs are expressed per 1 SD. LDL-C, LDL cholesterol; TC, total cholesterol.

<sup>a</sup>Unadjusted models, stratified by sex.

<sup>b</sup>The models were stratified by sex and adjusted for age at baseline, BMI, waist circumference, eastern location in Finland, HDL-C, CRP, systolic blood pressure (15 mmHg added for those on antihypertensive medication), lipid lowering treatment, current smoking, family history of diabetes, physical activity and educational level, fasting glucose and HbA<sub>1c</sub>.

**ESM Table 5.** Baseline characteristics of the WECAC study.

| Characteristic                  | WECAC               |                     | WECAC (HbA <sub>1c</sub> < 47.5 mmol/mol) |                     |
|---------------------------------|---------------------|---------------------|-------------------------------------------|---------------------|
|                                 | No diabetes         | Incident diabetes   | No diabetes                               | Incident diabetes   |
| N                               | 3190                | 154                 | 2258                                      | 94                  |
| Sex (male)                      | 71 %                | 69 %                | 72 %                                      | 76 %                |
| Current smoker                  | 32 %                | 34 %                | 32 %                                      | 33 %                |
| Statin treatment                | 71 %                | 71 %                | 71 %                                      | 74 %                |
| Age (years)                     | 61 (54-69)          | 62 (57-71)          | 61 (54-69)                                | 65 (58-72)          |
| BMI                             | 26.0 (24.0-28.0)    | 29.0 (26.0-31.0)    | 26.0 (24.0-28.0)                          | 29.0 (26.0-31.0)    |
| Glucose (mmol/l)                | 5.4 (5.0-6.0)       | 6.4 (5.7-7.6)       | 5.4 (5.0-6.0)                             | 6.2 (5.6-7.5)       |
| HbA <sub>1c</sub> (mmol/mol)    | 41 (34-49)          | 44 (37-53)          | 38 (31-42)                                | 40 (33-43)          |
| HbA <sub>1c</sub> (%)           | 5.9 (5.3-6.6)       | 6.2 (5.6-7.0)       | 5.6 (5.0-6.0)                             | 5.8 (5.2-6.1)       |
| Systolic blood pressure (mmHg)  | 140 (125-152)       | 140 (126-155)       | 139 (125-152)                             | 144 (130-155)       |
| TC (mmol/l)                     | 5.0 (4.3-5.8)       | 5.0 (4.3-5.7)       | 5.0 (4.3-5.8)                             | 5.0 (4.2-5.6)       |
| LDL-C (mmol/l)                  | 3.0 (2.4-3.8)       | 3.0 (2.4-3.6)       | 3.0 (2.4-3.8)                             | 3.0 (2.4-3.6)       |
| HDL-C (mmol/l)                  | 1.3 (1.1-1.5)       | 1.1 (1.0-1.3)       | 1.3 (1.1-1.5)                             | 1.1 (1.0-1.3)       |
| TG (mmol/l)                     | 1.4 (1.1-2.0)       | 1.8 (1.3-2.6)       | 1.4 (1.1-2.0)                             | 1.7 (1.2-2.4)       |
| CRP (mg/l)                      | 1.7 (0.8-3.3)       | 2.5 (1.2-5.0)       | 1.6 (0.8-3.3)                             | 2.2 (1.1-4.2)       |
| Cer(d18:1/18:0)/Cer(d18:1/16:0) | 0.387 (0.326-0.450) | 0.449 (0.385-0.507) | 0.382 (0.324-0.446)                       | 0.429 (0.364-0.497) |
| Cer(d18:1/16:0)/Cer(d18:1/24:0) | 0.099 (0.085-0.117) | 0.096 (0.083-0.117) | 0.100 (0.085-0.118)                       | 0.098 (0.089-0.123) |
| Cer(d18:1/18:0)/Cer(d18:1/24:0) | 0.038 (0.031-0.048) | 0.044 (0.036-0.053) | 0.038 (0.031-0.048)                       | 0.045 (0.036-0.054) |
| Cer(d18:1/24:1)/Cer(d18:1/24:0) | 0.415 (0.339-0.511) | 0.437 (0.353-0.509) | 0.419 (0.342-0.513)                       | 0.448 (0.365-0.566) |
| Cer(d18:1/16:0) (μmol/l)        | 0.254 (0.216-0.301) | 0.257 (0.217-0.310) | 0.256 (0.217-0.303)                       | 0.250 (0.216-0.298) |
| Cer(d18:1/18:0) (μmol/l)        | 0.098 (0.077-0.123) | 0.113 (0.091-0.145) | 0.097 (0.077-0.123)                       | 0.107 (0.088-0.139) |
| Cer(d18:1/24:0) (μmol/l)        | 2.605 (2.082-3.180) | 2.602 (2.188-3.239) | 2.607 (2.082-3.180)                       | 2.575 (2.063-2.975) |
| Cer(d18:1/24:1) (μmol/l)        | 1.065 (0.881-1.272) | 1.153 (0.969-1.396) | 1.072 (0.885-1.278)                       | 1.147 (0.969-1.368) |

Data are median (interquartile range) or % from total. HbA<sub>1c</sub> measurements were available for 99% of the all WECAC population, all other data were available for all individuals of the study. LDL-C, LDL cholesterol; TC, total cholesterol.

**ESM Table 6.** Hazard ratios of clinical laboratory measurements for incident diabetes in the WECAC study.

| WECAC                                     | HR (95% CI) <sup>a</sup> | p value <sup>a</sup>   | HR (95% CI) <sup>b</sup> | p value <sup>b</sup>   | HR (95% CI) <sup>c</sup> | p value <sup>c</sup>   |
|-------------------------------------------|--------------------------|------------------------|--------------------------|------------------------|--------------------------|------------------------|
| Glucose                                   | 2.18 (1.92, 2.49)        | <2.2×10 <sup>-16</sup> | 1.96 (1.71, 2.24)        | <2.2×10 <sup>-16</sup> | 1.93 (1.68, 2.21)        | <2.2×10 <sup>-16</sup> |
| HbA <sub>1c</sub>                         | 1.46 (1.21, 1.76)        | 6.3×10 <sup>-5</sup>   | 1.37 (1.13, 1.66)        | 0.001                  | 1.25 (1.04, 1.51)        | 0.018                  |
| CRP                                       | 1.41 (1.21, 1.64)        | 6.9×10 <sup>-6</sup>   | 1.20 (1.02, 1.43)        | 0.033                  | 1.17 (0.99, 1.39)        | 0.064                  |
| TC                                        | 0.98 (0.83, 1.15)        | 0.798                  | 1.05 (0.88, 1.27)        | 0.567                  | 1.05 (0.87, 1.27)        | 0.605                  |
| LDL-C                                     | 0.99 (0.85, 1.16)        | 0.923                  | 1.01 (0.84, 1.21)        | 0.907                  | 1.05 (0.87, 1.26)        | 0.614                  |
| HDL-C                                     | 0.65 (0.56, 0.77)        | 2.8×10 <sup>-7</sup>   | 0.67 (0.56, 0.80)        | 1.1×10 <sup>-5</sup>   | 0.72 (0.60, 0.87)        | 5.9×10 <sup>-4</sup>   |
| TG                                        | 1.54 (1.33, 1.78)        | 5.3×10 <sup>-9</sup>   | 1.32 (1.10, 1.58)        | 0.003                  | 1.15 (0.95, 1.38)        | 0.143                  |
| WECAC (HbA <sub>1c</sub> < 47.5 mmol/mol) |                          |                        |                          |                        |                          |                        |
| Glucose                                   | 2.03 (1.73, 2.40)        | <2.2×10 <sup>-16</sup> | 1.86 (1.56, 2.21)        | 2.3×10 <sup>-12</sup>  | 1.85 (1.55, 2.20)        | 5.4×10 <sup>-12</sup>  |
| HbA <sub>1c</sub>                         | 1.36 (1.04, 1.77)        | 0.026                  | 1.24 (0.95, 1.63)        | 0.111                  | 1.17 (0.90, 1.53)        | 0.234                  |
| CRP                                       | 1.30 (1.07, 1.58)        | 0.009                  | 1.09 (0.88, 1.36)        | 0.428                  | 1.11 (0.89, 1.39)        | 0.346                  |
| TC                                        | 0.89 (0.73, 1.10)        | 0.288                  | 0.97 (0.76, 1.23)        | 0.787                  | 0.94 (0.74, 1.20)        | 0.634                  |
| LDL-C                                     | 0.99 (0.81, 1.21)        | 0.919                  | 1.03 (0.81, 1.31)        | 0.806                  | 1.03 (0.81, 1.31)        | 0.796                  |
| HDL-C                                     | 0.65 (0.52, 0.80)        | 7.4×10 <sup>-5</sup>   | 0.66 (0.52, 0.84)        | 6.4×10 <sup>-4</sup>   | 0.69 (0.54, 0.88)        | 0.003                  |
| TG                                        | 1.34 (1.10, 1.62)        | 0.003                  | 1.11 (0.88, 1.40)        | 0.386                  | 1.00 (0.79, 1.27)        | 0.988                  |

HRs are expressed per 1 SD. LDL-C, LDL cholesterol; TC, total cholesterol.

<sup>a</sup>Unadjusted models, stratified by vitamin B intervention groups.

<sup>b</sup>The models are stratified by vitamin B intervention groups and adjusted for age at baseline, sex, BMI, HDL-C, CRP, systolic blood pressure, lipid lowering treatment and current smoking and <sup>c</sup>additionally for fasting glucose and HbA<sub>1c</sub>.

**ESM Table 7.** Performance of predictive models in the WECAC substudy with HbA<sub>1c</sub> < 47.5 mmol/mol.

| Variables                                      | C statistic | HL <i>p</i> value | Δ C statistic | Δ <i>p</i> value |
|------------------------------------------------|-------------|-------------------|---------------|------------------|
| Age + BMI + Sex + TG + Ceramide ratio          | 0.719       | 0.084             | 0.011         | 0.312            |
| Age + BMI + Sex + TG                           | 0.708       | 0.385             |               |                  |
| Age + BMI + Sex + HDL-C + Ceramide ratio       | 0.731       | 0.123             | 0.012         | 0.343            |
| Age + BMI + Sex + HDL-C                        | 0.719       | 0.129             |               |                  |
| Age + BMI + Sex + CRP + Ceramide ratio         | 0.719       | 0.603             | 0.016         | 0.228            |
| Age + BMI + Sex + CRP                          | 0.703       | 0.547             |               |                  |
| Age + BMI + Sex + Systolic bp + Ceramide ratio | 0.712       | 0.299             | 0.019         | 0.124            |
| Age + BMI + Sex + Systolic bp                  | 0.692       | 0.387             |               |                  |
| Age + BMI + Sex + Ceramide ratio               | 0.717       | 0.494             | 0.018         | 0.188            |
| Age + BMI + Sex                                | 0.699       | 0.508             |               |                  |
| Age + Sex + Ceramide ratio                     | 0.658       | 0.260             | 0.086         | 0.007            |
| Age + Sex                                      | 0.572       | 0.127             |               |                  |

In addition to C statistics, the table shows Hosmer-Lemeshow (HL) test *p* value for model calibration, and difference of C statistics together with *p* values for models with and without the Cer(d18:1/18:0)/Cer(d18:1/16:0) ceramide ratio.

<sup>a</sup>DM2 (type 2 diabetes) risk factors = family history, physical activity, waist circumference, systolic blood pressure with 15 mmHg added for those on antihypertensive medication

**ESM Table 8.** Baseline characteristics of the PrevMetSyn study.

| Characteristic                  | Baseline            |
|---------------------------------|---------------------|
| N                               | 371                 |
| Sex (male)                      | 51 %                |
| Age (years)                     | 49 (41-54)          |
| BMI                             | 30.0 (28.6-31.8)    |
| Glucose (mmol/L)                | 5.5 (5.2-5.8)       |
| HbA <sub>1c</sub> (mmol/mol)    | 38 (36-41)          |
| HbA <sub>1c</sub> (%)           | 5.6 (5.4-5.9)       |
| Systolic blood pressure (mmHg)  | 130 (119-141)       |
| TC (mmol/L)                     | 5.3 (4.7-6.0)       |
| LDL-C (mmol/L)                  | 3.6 (3.0-4.2)       |
| HDL-C (mmol/L)                  | 1.4 (1.2-1.7)       |
| TG (mmol/L)                     | 1.2 (0.9-1.7)       |
| CRP (mg/L)                      | 1.2 (0.4-3.1)       |
| Cer(d18:1/18:0)/Cer(d18:1/16:0) | 0.494 (0.416-0.577) |
| Cer(d18:1/16:0)/Cer(d18:1/24:0) | 0.081 (0.072-0.095) |
| Cer(d18:1/18:0)/Cer(d18:1/24:0) | 0.040 (0.033-0.049) |
| Cer(d18:1/24:1)/Cer(d18:1/24:0) | 0.493 (0.425-0.556) |
| Cer(d18:1/16:0) (μmol/l)        | 0.231 (0.201-0.269) |
| Cer(d18:1/18:0) (μmol/l)        | 0.117 (0.093-0.146) |
| Cer(d18:1/24:0) (μmol/l)        | 2.844 (2.393-3.443) |
| Cer(d18:1/24:1) (μmol/l)        | 1.380 (1.191-1.617) |

*Data are median (interquartile range) or % from total.*

*Data for all variables were available for all participants.*

*LDL-C, LDL cholesterol; TC, total cholesterol.*



## ESM Figures

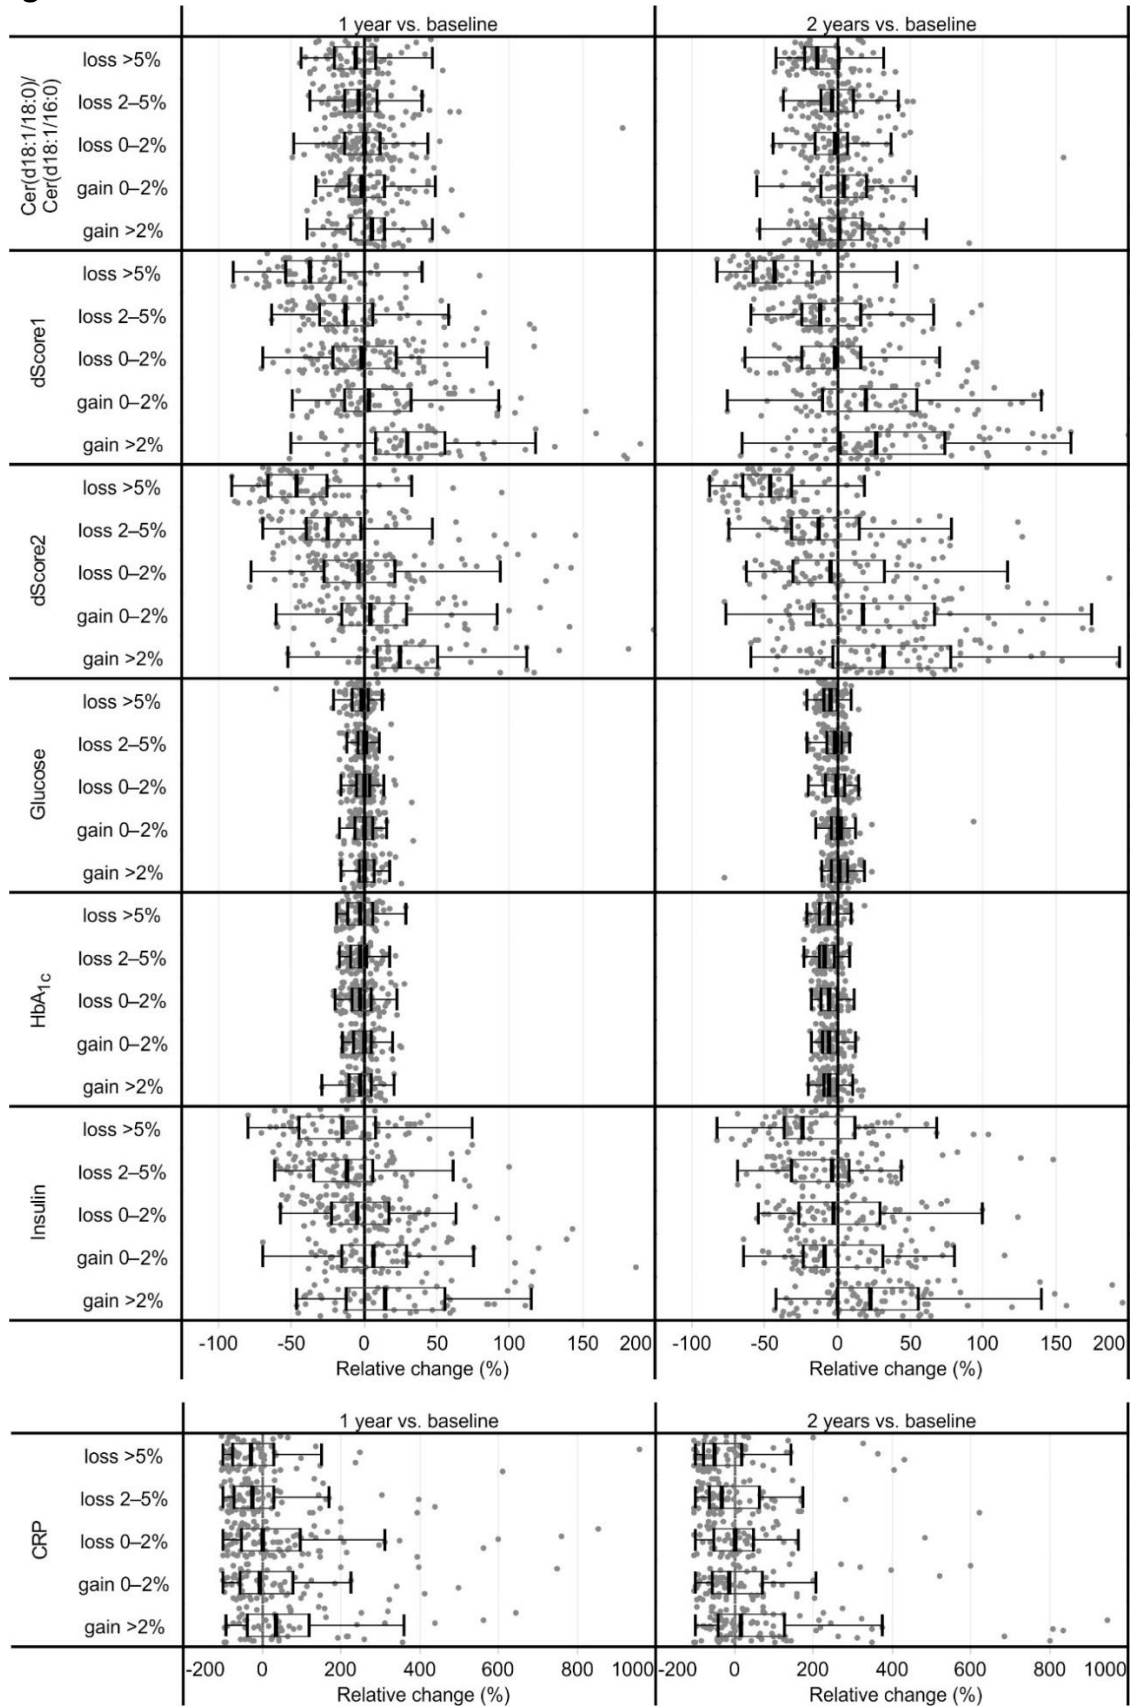

**ESM Fig. 1.** Change of ceramide ratio and other variables shown for all participants with different weight change after 1 or 2 years due to dietary intervention. 7 outlier observations have been excluded from dScore1, dScore2 and CRP variables to improve readability of the figure. Whiskers in boxplots represent data within 1.5 times the interquartile range.
